# Supplementary material for: Quantification of surface species present on a nickel/alumina methane reforming catalyst
Source: Royal Society of Chemistry journal article supplement (doi:10.1039/b919977b), 2010-01-01
Supplement: b919977b.pdf [file b919977b.pdf]

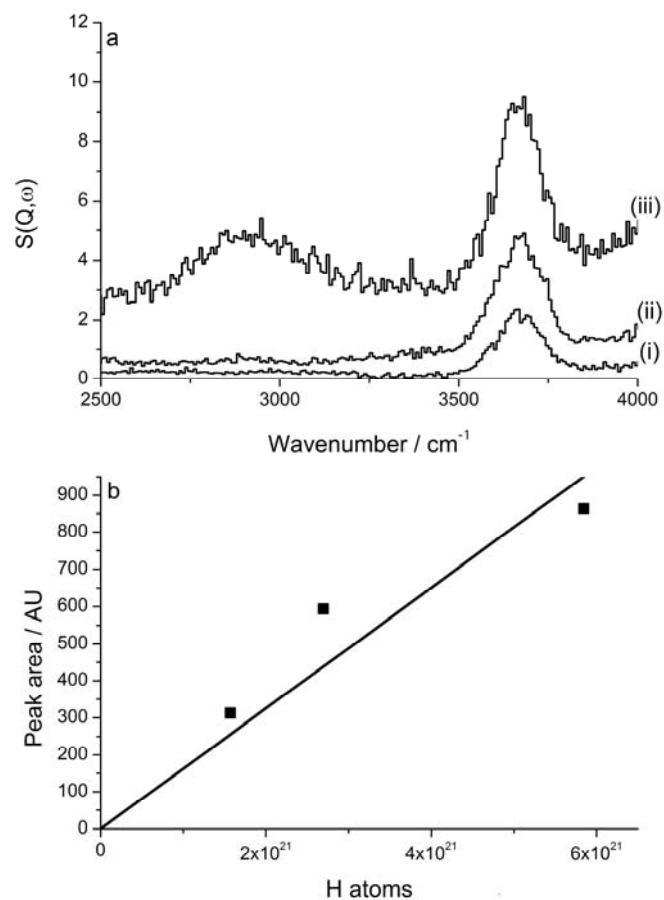

**Figure S1:** (a) INS spectra of talc ( $\text{Mg}_3\text{Si}_4\text{O}_{10}(\text{OH})_2$ ) in the region  $2500\text{--}4000\text{cm}^{-1}$  for three different masses of talc: (i) 494 mg (ii) 848 mg and (iii) 1840 mg. (b) A plot of integrated band intensity of the  $\nu(\text{O-H})$  mode of talc as a function of the number of hydrogen atoms for a given mass. The straight line represents a linear least squares fit to the data.
